# Supplementary material for: Direct versus acetalization routes in the reaction network of catalytic HMF etherification
Source: Royal Society of Chemistry journal article supplement (doi:10.1039/c7cy02339a), 2018-01-01
Supplement: c7cy02339a1.pdf [file c7cy02339a1.pdf]

Electronic Supplementary Material (ESI) for Catalysis Science & Technology.

## Direct versus Acetalization Routes in the Reaction Network of Catalytic HMF Etherification

P. Lanzafame,<sup>\*a</sup> G. Papanikolaou,<sup>a</sup> S. Perathoner,<sup>a</sup> G. Centi,<sup>a</sup> M. Migliori<sup>\*b</sup>, E. Catizzone,<sup>b</sup> A. Aloise<sup>b</sup> and G. Giordano<sup>b</sup>

<sup>a</sup> Departments of ChiBioFarAm and MIFT- Section of Industrial Chemistry, University of Messina, ERIC aisbl and CASPE-INSTM, V.le F. Stagno d'Alcontres 31, 98166 Messina, Italy. E-mail: [planzafame@unime.it](mailto:planzafame@unime.it)

<sup>b</sup> Department of Environmental and Chemical Engineering, University of Calabria, via Bucci, 87036 Rende, Italy. E-mail: [massimo.migliori@unical.it](mailto:massimo.migliori@unical.it)

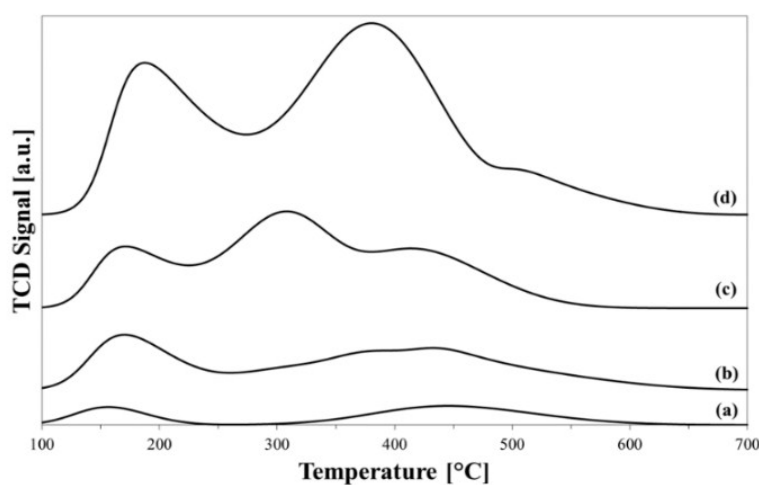

**Figure S1:** NH<sub>3</sub>-TPD curves obtained on Silicalite-1 (a), B-MFI (b), Fe-MFI (c) and Al-MFI (d) catalysts.

**Table S1:** Molar balance for the etherification of HMF with ethanol

| Samples      | Reacted HMF (mmol) | EMF (mmol) | EOP (mmol) | HMFDEA (mmol) | EMFDEA (mmol) | Total products (mmol) | Mass Balance (%) |
|--------------|--------------------|------------|------------|---------------|---------------|-----------------------|------------------|
| Silicalite-1 | 1.115              | 0.385      | 0.035      | 0.387         | 0.194         | 1.001                 | 90               |
| B-MFI        | 1.364              | 0.760      | 0.062      | 0.144         | 0.270         | 1.236                 | 91               |
| Fe-MFI       | 1.520              | 0.974      | 0.060      | 0.093         | 0.296         | 1.423                 | 94               |
| Al-MFI       | 1.916              | 1.453      | 0.055      | 0.027         | 0.297         | 1.832                 | 96               |
